# Supplementary material for: Technical note: CO 2 is not like CH 4 – limits of and corrections to the headspace method to analyse p CO 2 in fresh water
Source: Copernicus journal article supplement (doi:10.5194/bg-18-1619-2021), 2021-03-09
Supplement: Supplementary file 1 [file bg-18-1619-2021-supplement.zip]

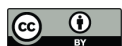

## *Supplement of*

# **Technical note: CO<sub>2</sub> is not like CH<sub>4</sub> – limits of and corrections to the headspace method to analyse *p*CO<sub>2</sub> in fresh water**

**Matthias Koschorreck et al.**

*Correspondence to:* Matthias Koschorreck ([matthias.koschorreck@ufz.de](mailto:matthias.koschorreck@ufz.de))

- [bg-18-1619-2021-supplement-title-page.pdf](#)
- [CO2 is not like CH4 SI.xlsx](#)

The copyright of individual parts of the supplement might differ from the CC BY 4.0 License.
